# Supplementary material for: The Relationship Between Cognitive Dysfunction and Symptom Dimensions Across Schizophrenia, Bipolar Disorder, and Major Depressive Disorder
Source: PubMed Central journal article supplement (PMC6498739; doi:10.3389/fpsyt.2019.00253), 2019-04-26
Supplement: Table_1.pdf [file Table_1.pdf]

**Supplemental Table 1. Correlations between Clinical Symptom Dimensions and Cognition in SZ, BD and MDD**

|                    | BPRS Total    |               |               | Affective symptoms   |               |               | Psychosis     |               |               | Negative/<br>Disorganized symptoms |               |                          |
|--------------------|---------------|---------------|---------------|----------------------|---------------|---------------|---------------|---------------|---------------|------------------------------------|---------------|--------------------------|
|                    | SZ            | BD            | MDD           | SZ                   | BD            | MDD           | SZ            | BD            | MDD           | SZ                                 | BD            | MDD                      |
| <b>MCCB</b>        |               |               |               |                      |               |               |               |               |               |                                    |               |                          |
| TMT-A              | 0.114(0.419)  | 0.067(0.780)  | 0.125(0.579)  | 0.230(0.100)         | -0.252(0.284) | -0.203(0.364) | -0.045(0.754) | 0.232(0.326)  | 0.261(0.240)  | 0.193(0.171)                       | 0.256(0.275)  | <b>0.659(0.001)</b>      |
| Symbol Coding      | -0.182(0.195) | -0.087(0.715) | -0.121(0.593) | -0.336(0.015)        | 0.335(0.149)  | 0.107(0.636)  | 0.024(0.868)  | -0.289(0.216) | -0.177(0.430) | -0.151(0.284)                      | -0.195(0.411) | -0.473(0.026)            |
| Category Fluency   | -0.035(0.807) | 0.015(0.951)  | -0.329(0.135) | -0.305(0.028)        | 0.336(0.148)  | -0.071(0.754) | 0.199(0.158)  | -0.216(0.361) | -0.280(0.207) | -0.170(0.229)                      | -0.077(0.747) | <b>-0.590(0.004)</b>     |
| Spatial Span       | -0.055(0.697) | 0.091(0.702)  | -0.463(0.030) | -0.010(0.946)        | 0.286(0.222)  | -0.201(0.370) | 0.049(0.732)  | 0.010(0.967)  | -0.084(0.709) | -0.132(0.352)                      | 0.056(0.815)  | <b>-0.737(&lt;0.001)</b> |
| Letter-Number Span | -0.299(0.031) | 0.123(0.605)  | -0.529(0.011) | <b>-0.460(0.001)</b> | 0.347(0.134)  | -0.454(0.034) | -0.146(0.302) | 0.157(0.510)  | -0.126(0.577) | -0.180(0.201)                      | -0.153(0.521) | -0.344(0.117)            |
| HVLT-R             | 0.026(0.857)  | 0.097(0.683)  | -0.149(0.508) | -0.043(0.761)        | 0.351(0.130)  | 0.013(0.956)  | 0.198(0.158)  | 0.045(0.852)  | 0.105(0.643)  | -0.164(0.245)                      | 0.070(0.770)  | -0.458(0.032)            |
| BVMT-R             | -0.074(0.060) | 0.111(0.640)  | -0.200(0.371) | <b>-0.394(0.004)</b> | 0.366(0.112)  | -0.121(0.591) | 0.104(0.465)  | 0.108(0.651)  | -0.161(0.474) | -0.115(0.419)                      | -0.136(0.569) | -0.194(0.386)            |
| Mazes              | -0.235(0.094) | -0.046(0.846) | -0.201(0.370) | -0.184(0.192)        | 0.223(0.345)  | -0.007(0.976) | -0.059(0.680) | -0.255(0.277) | -0.209(0.350) | -0.225(0.109)                      | -0.094(0.695) | -0.423(0.050)            |
| CPT-IP             | -0.063(0.655) | -0.108(0.650) | 0.252(0.258)  | -0.100(0.481)        | 0.370(0.108)  | -0.089(0.694) | 0.139(0.324)  | -0.376(0.103) | -0.165(0.463) | -0.223(0.112)                      | -0.229(0.330) | -0.397(0.067)            |
| MSCEIT             | -0.077(0.589) | -0.016(0.947) | -0.041(0.858) | -0.226(0.108)        | -0.189(0.426) | 0.036(0.873)  | -0.018(0.901) | 0.095(0.691)  | 0.475(0.025)  | 0.027(0.847)                       | 0.052(0.828)  | -0.376(0.084)            |
| <b>WCST</b>        |               |               |               |                      |               |               |               |               |               |                                    |               |                          |
| CR                 | -0.134(0.229) | -0.058(0.596) | -0.072(0.506) | -0.020(0.856)        | -0.014(0.901) | -0.029(0.790) | -0.012(0.914) | -0.014(0.899) | 0.019(0.862)  | -0.257(0.019)                      | -0.108(0.319) | -0.198(0.064)            |
| CC                 | -0.091(0.414) | -0.027(0.807) | -0.139(0.196) | 0.025(0.825)         | 0.007(0.948)  | -0.109(0.310) | -0.057(0.607) | 0.008(0.940)  | -0.028(0.794) | -0.149(0.179)                      | -0.098(0.366) | -0.185(0.085)            |
| TE                 | 0.141(0.204)  | 0.071(0.511)  | 0.065(0.549)  | 0.028(0.800)         | 0.026(0.81)   | 0.022(0.841)  | 0.018(0.868)  | 0.034(0.753)  | -0.022(0.839) | 0.256(0.019)                       | 0.121(0.262)  | 0.195(0.068)             |
| PE                 | 0.195(0.078)  | 0.014(0.894)  | 0.073(0.498)  | 0.203(0.065)         | -0.084(0.438) | 0.007(0.947)  | 0.076(0.493)  | 0.101(0.352)  | -0.024(0.826) | 0.171(0.121)                       | 0.058(0.591)  | 0.241(0.024)             |
| NPE                | -0.029(0.798) | 0.079(0.467)  | 0.001(0.995)  | -0.208(0.059)        | 0.132(0.221)  | 0.026(0.812)  | -0.061(0.585) | -0.108(0.320) | -0.002(0.984) | 0.168(0.128)                       | 0.108(0.322)  | -0.028(0.798)            |

Note: Data are presented as r-value (P-value). Bold indicates significance at  $p < 0.05$ , after false discovery rate correction.

There was no significant association between “Activation” and “Noncooperation” with cognition.
